# Supplementary material
Source: publisher site journal article supplement (https://www.dovepress.com/article/594220)
Supplement: Supplementary file 1 [file 594220%20Supplementary%20Material.docx]

**Supplementary Material**

**MATERIALS AND METHODS**

**Materials**

FeCl3 **·**6H2O, K4(Fe(CN)6)3, KSeCN, Fluorescein diacetat (FDA), propidium iodide (PI) and cell counting kit-8 (CCK-8) were obtained from Sigma-Aldrich (USA). PBS were purchased from Thermo-Fisher (USA). 2′,7′-Dichlorofluorescin diacetate (DCFH-DA) were obtained from Solarbio life sciences. All reagents used in this work were analytical reagents (A.R.) and used without any further purification. All of the aqueous solutions were prepared using purified deionized (DI) water purified with a purification system (Direct-Q3, Millipore, USA).

**Fabrication of FeSePB**

Se-doped Prussian blue analogues were prepared via a modified co-precipitation method by partial substitution of the hexacyanoferrate precursor with KSeCN. A total of two aqueous solutions were utilized: solution A was obtained by dissolving K3[Fe(CN)6] and the dopant KSeCN in deionized water at a predetermined molar ratio, while solution B was prepared by dissolving an iron(II) salt in deoxygenated water acidified with dilute hydrochloric acid to prevent oxidation. Under an inert nitrogen atmosphere and with continuous vigorous stirring, solution A was dropwise added to solution B over a period of 30 min. The resulting mixture was then stirred at room temperature for an additional 6 hours to allow for complete particle growth. The precipitated product was subsequently collected by centrifugation, washed repeatedly with deionized water and ethanol, and finally dried under vacuum at 60 °C for 12 h, yielding FeSePB.

**Cell culture**

K7M2 cells and bone marrow mesenchymal stem cells (BMSC) were obtained from the Shanghai Institute of Life Sciences, Chinese Academy of Sciences, and cultured in RPMI-1640 medium containing 10% fetal bovine serum in a CO2 incubator at 37 ℃ with 5 % CO2.

**Animal tumor models**

All healthy female BALB/c nude mice were purchased from the Beijing Vital River Laboratory Animal Technology Co., Ltd. (China). All animal experiments were approved by the Medical Ethics Committee of Second Affiliated Hospital of Guangxi Medical University (Ethical number: 2025-KYL(068)).

For laser irradiation treatment, mice were anesthetized via intraperitoneal injection of sodium pentobarbital (1% w/v). At the experimental endpoint, euthanasia was performed by administering an overdose of sodium pentobarbital, in accordance with the American Veterinary Medical Association (AVMA) guidelines.

**Characterization**

Images of the morphology were captured using a transmission electron microscope (JEM-F200, Japan). Diameter of nanoparticles were measured by dynamic light scattering (Nano-Zen 3600, Malvern Instruments, UK). The surface chemical elements were analyzed by X-ray photoelectron spectroscopy, XPS (ESCA-Lab250XI, Thermo Fisher Ltd., USA). Scanning electron microscopy (SEM) images were captured on a Hitachi FE-SEM S4800 instrument with an acceleration voltage of 3 kV.

**Synthesis of Hydrogel**

15 mg agarose was dispersed in 10 mL of deionized water in 50 ℃ to obtain pure hydrogel. 20 mg agarose and 10 mg FeSePB was dispersed in 10 mL of deionized solution in 50 ℃ to obtain FeSePB-based hydrogel. For the in vivo experiments, the hydrogel was injected using a 1 mL syringe equipped with a 0.45 mm needle. The fabrication principle of the FePB hydrogel remains consistent with that described previously, with only the raw materials being replaced.

**Rheological test**

Rheology experiments were performed on an Anton Paar rheometer. Different temperature of the hydrogel samples were prepared and gently placed on the middle of a 15 mm diameter parallel plate with a proper gap. Dynamic oscillatory frequency sweep measurements were conducted at a 1% strain amplitude. To prevent the evaporation of water, a lid was prepared on the top. The hydrogel samples were prepared into a diameter of approximately 15 mm and a thickness of 1.0 mm. A gap of 1.0 mm was set between the 15 mm diameter parallel plates.

**Photothermal Conversion Ability**

An 808 nm NIR laser (Changchun New Industries Tech.Co., Ltd, China) with irradiation powers was used to stimulate the different materials (PBS, FePB and FeSePB) in an aqueous medium. The photothermal images of the FeSePB based suspensions during laser irradiation were recorded every 30 s using an infrared thermal imaging system. The NIR laser source was equipped with a 4 mm diameter laser module with an adjustable power. The photothermal conversion performance of various hydrogels was assessed using the identical experimental protocol elaborated previously. In terms of photothermal stability evaluation, FeSePB samples were subjected to laser irradiation for a duration of 5 minutes. After terminating the laser exposure, the system was left undisturbed until the solution temperature recovered to the initial value, and this cyclic process was replicated three consecutive times.

**Intracellular reactive oxygen species (ROS) generation**

For determination of ROS levels via fluorescent imaging, 2 × 105 K7M2 cells were incubated with six different groups: (1) Control, (2) L, (3) FePB, (4) FeSePB, (5) FePB + L and (6) FeSePB + L. The FeSePB and FePB concentration was 100 μg/mL in group 3, 4, 5 and 6. Then, DCFH-DA was added and co-incubated for 20 min at 37 °C. Then, cells in each group were irradiated with the 808 nm laser at a power density of 1 W/cm2 for 5 min. ROS level was determined by fluorescence microscopy (IX81, Olympus, Japan). The fluorescent intensity of each group was calculated by a FlowJo software.

**In vitro anti-tumor ability of FeSePB**

2 × 105 K7M2 cells were incubated with six different groups: (1) Control, (2) L, (3) FePB, (4) FeSePB, (5) FePB + L and (6) FeSePB + L. Then, cells in each group were irradiated with the 808 nm laser at a power density of 1 W/cm2 for 5 min. Following this, the cells were subjected to thorough rinsing with PBS, prior to being incubated with FDA and PI at the recommended concentrations and durations specified in the manufacturer’s protocol; cellular fluorescence signals were then examined using a fluorescence microscope (Model IX81, Olympus, Japan). Cell viability was quantitatively measured via the CCK-8 assay, following the identical experimental workflow as described earlier. he cytotoxicity was calculated by dividing the optical density (OD) values of treated groups (T) by the OD values of the control (C) (T/C × 100%).

**Osteogenesis of FeSePB**

BMSCs were incubated in 24-well plates at 2 × 104 cells/well and treated with six different groups: (1) Control, (2) L, (3) FePB, (4) FeSePB, (5) FePB + L and (6) FeSePB + L. Laser power density was 1 W/cm2. FDA/PI fluorescent staining was conducted to determine cell viability, and the CCK-8 assay was used for the detection of cell proliferation. Additionally, this assay was applied to measure cell viability across a series of distinct treatment durations.

**Osteogenic activity**

ALP activity of BMSCs adhered on liquid crystal hydrogels was detected following BCA protein kit and AKP kit by measuring the OD values at 562 and 520 nm, [respectively](javascript:;). Cells were seeded at a density of 2×105 cells per well in 24‑well plates. After culture for 21 days, the calcium nodules secreted by BMSCs were counterstained with 1% alizarin red dye solution for qualitative detection by a stereomicroscope. Then, the quantitatively results were obtained by desorbing the stained cells with 10% cetylpyridinium chloride solution and measuring the OD value at 540 nm. The expression levels of osteogenesis-related genes, including Runx2, CoL-I and OCN, were assessed by quantitative reverse-transcription polymerase chain reaction.

**Cytoskeleton analysis**

To observe the morphological changes of cell cytoskeleton and nucleus and evaluate the cell adhesion, BMSCs adhered on liquid crystal hydrogels were first fixed with 4% paraformaldehyde for 15 min at room temperature, followed by permeabilization with 0.1% Triton X-100 for 10 min. Subsequently, the F-actin cytoskeleton and cell nucleus were counterstained with rhodamine-labeled phalloidin for 1 h and DAPI for 20 min, respectively, in the dark. After staining, the cells were washed three times with PBS (pH 7.4) to remove unbound dyes, and then observed under a fluorescence microscope.

**Antibacterial Activity of FeSePB**

E. coil and S. aureus were used as bacterial models to evaluate the bacterial inhibitory activities of the FeSePB (20 mm in diameter and 2 mm in height). The experiments are grouped as follows: (1) Control, (2) L, (3) FePB, (4) FeSePB, (5) FePB + L and (6) FeSePB + L. Laser power density was 1 W/cm2. Inhibition of biofilm formation: 50 μL of bacterial suspension (1 × 108 CFU/mL) intervened with the above sample groups were diluted with 1 mL of sterile PBS and sonicated for 5 min. Then, 200 μL of them were added in 96-well plates and incubated in a bacterial incubator at 37 °C for 36 h to form biofilms. After washing with PBS to discard planktonic bacteria, the biofilms were fixed with 4% paraformaldehyde for 10 min, and stained with 0.1% crystal violet staining solution for 30 min away from light. After washing with deionized water, the stained biofilms were air-dried and captured by a stereomicroscope (Stemi 2000-C, Carl Zeiss, Germany). Subsequently, the biofilm biomass was decolorized by anhydrous ethanol (200 μL/well) at 37 ℃, and the OD value at 590 nm was determined by an ELISA instrument.

**In vivo antitumor study**

1×106 K7M2 cells suspended in 100 μl PBS were subcutaneously injected into each mouse to establish the tumor models. When tumor size reached approximately 200 mm3, the mice were divided randomly into 6 groups (each group included 5 mice): (1) Control, (2) L, (3) FePB, (4) FeSePB, (5) FePB + L and (6) FeSePB + L. The injection volume of hydrogel is 100 μL, and the concentration of FeSePB and FePB is 10 mg/kg. The semiconductor laser device at 808 nm was used as a source of laser light. The treatment was conducted every 2 days for 16 days. Mice body weight and tumor volume in all groups were monitored every 2 days. A caliper was employed to measure the tumor length and tumor width and the tumor volume was calculated according to following formula. Tumor volume = tumor length × tumor width2 / 2. After 16 days treatment, all the mice were sacrificed. Five main organs (heart, liver, spleen, lung and kidney) of all mice were harvested, washed with PBS, and fixed with paraformaldehyde for histology analysis. And the tumor tissues were weighed, and fixed in 4% neutral buffered formalin, processed routinely into paraffin, and sectioned at 4 μm. Then the sections were stained with hematoxylin and eosin (H&E) and terminal deoxynucleotidyl (TUNEL) staining and finally examined by using an optical microscope.

**Statistical analysis**

All quantitative data are expressed as mean ± standard deviation (SD) from at least three independent biological replicates. Statistical comparisons were performed using GraphPad Prism (ver. 10.1.2). For two‑group comparisons, a two‑tailed unpaired Student’s t‑test was applied. For experiments involving three or more groups, one‑way analysis of variance (ANOVA) was used followed by Tukey’s post hoc test. *P < 0.05, **P < 0.01, ***P < 0.001.


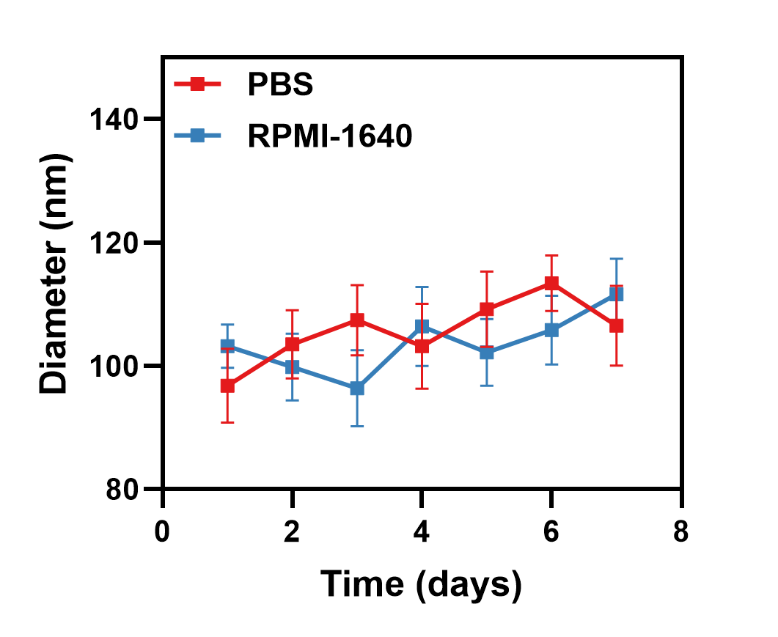


Figure S1. Particle size of FeSePB in different solution revealed by DLS detection.


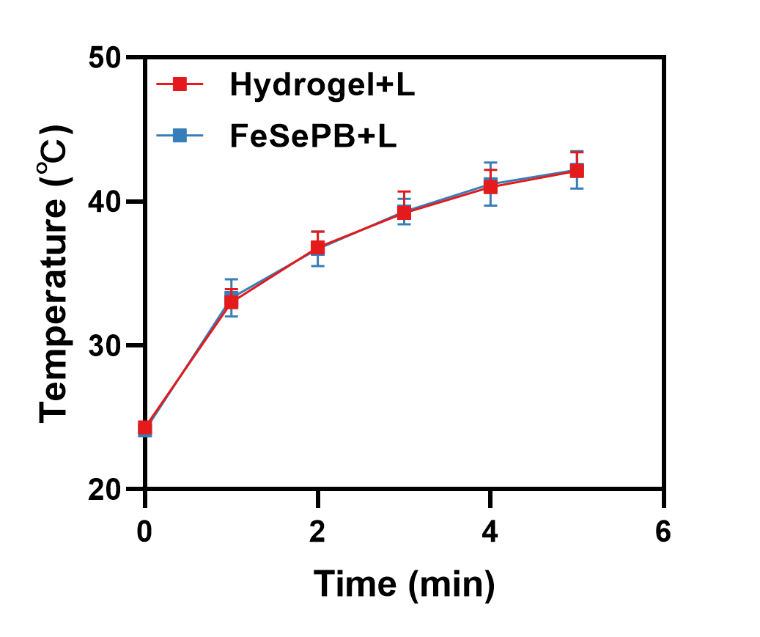


Figure S2. Temperature rise curves of different groups under 808 nm laser irradiation.


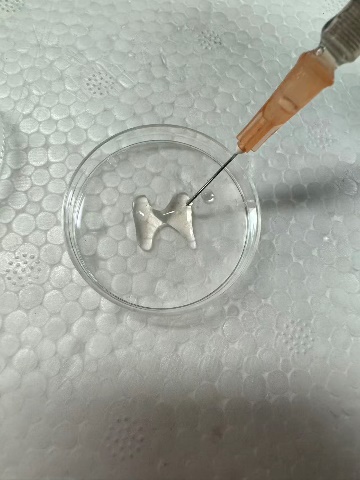


Figure S3. Injectability of the agarose hydrogel.


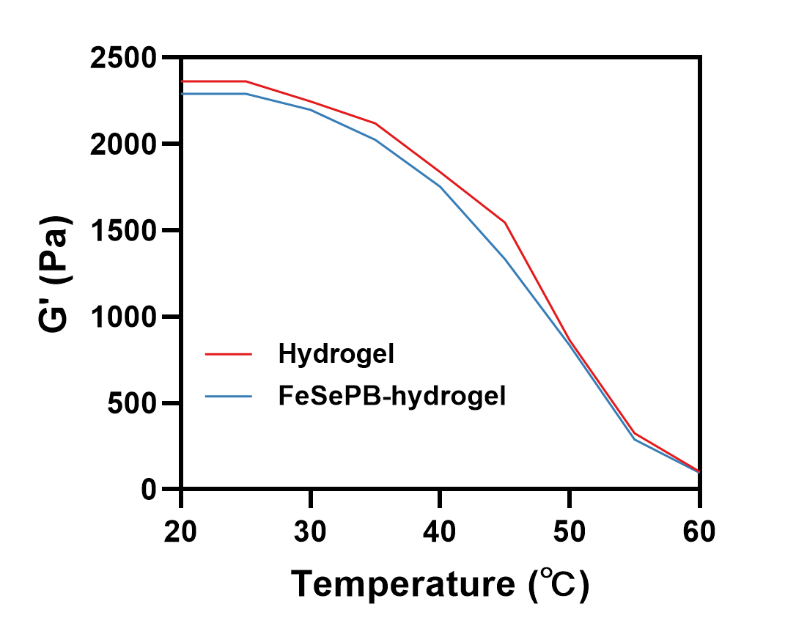


Figure S4. Temperature-dependent storage modulus curve of FeSePB-loaded agarose hydrogel.


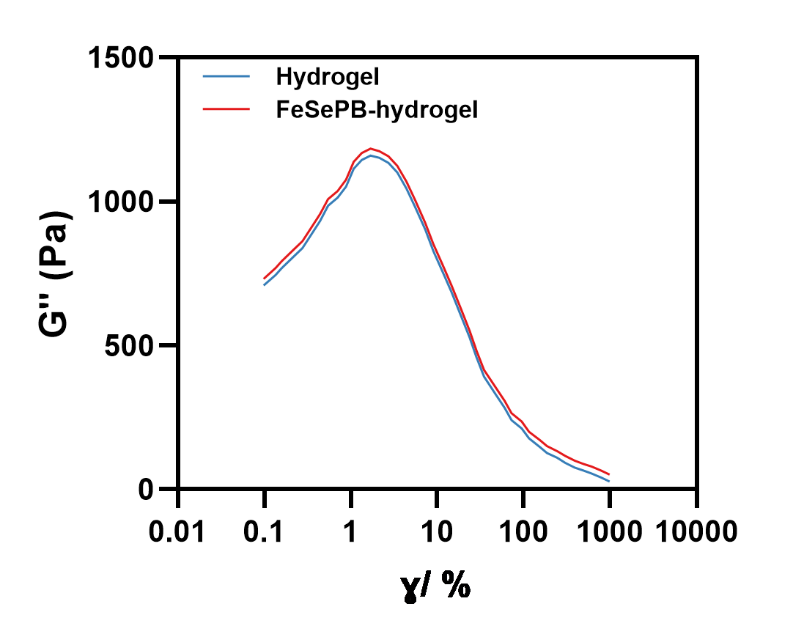


Figure S5. Shear strain-dependent storage modulus curve of FeSePB-loaded agarose hydrogel.


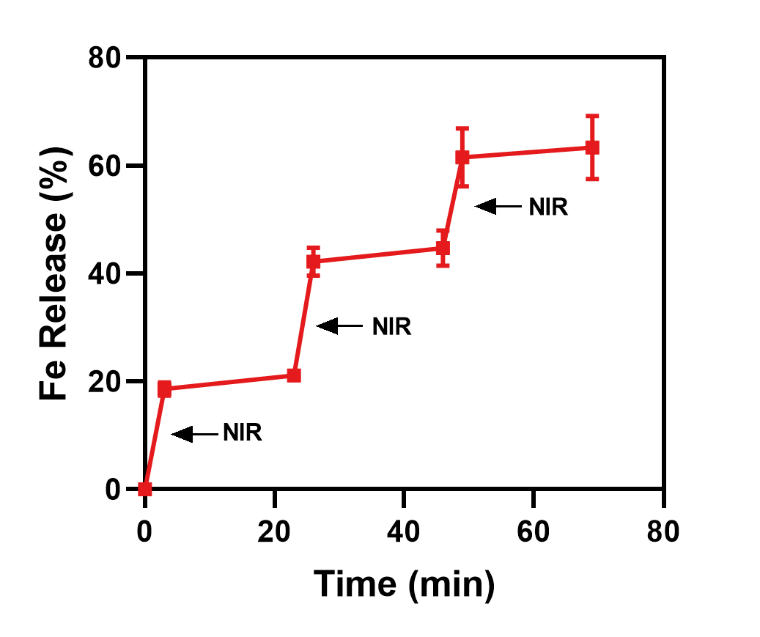


Figure S6. Temporal release profile of the hydrogel in response to laser on and off irradiation.





Figure S7. Live/dead cell staining of different treatment groups under bright-field and fluorescence microscopy.


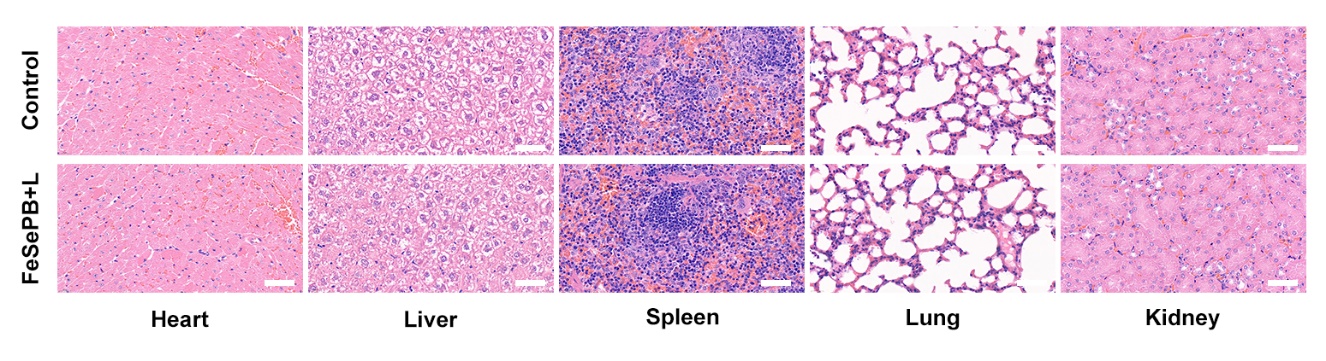


Figure S8. Histopathologic examination of the tissues, including the heart, liver, spleen, lung, and kidney, from BALB/c nude mice after different treatments. Scale bar: 50 μm.


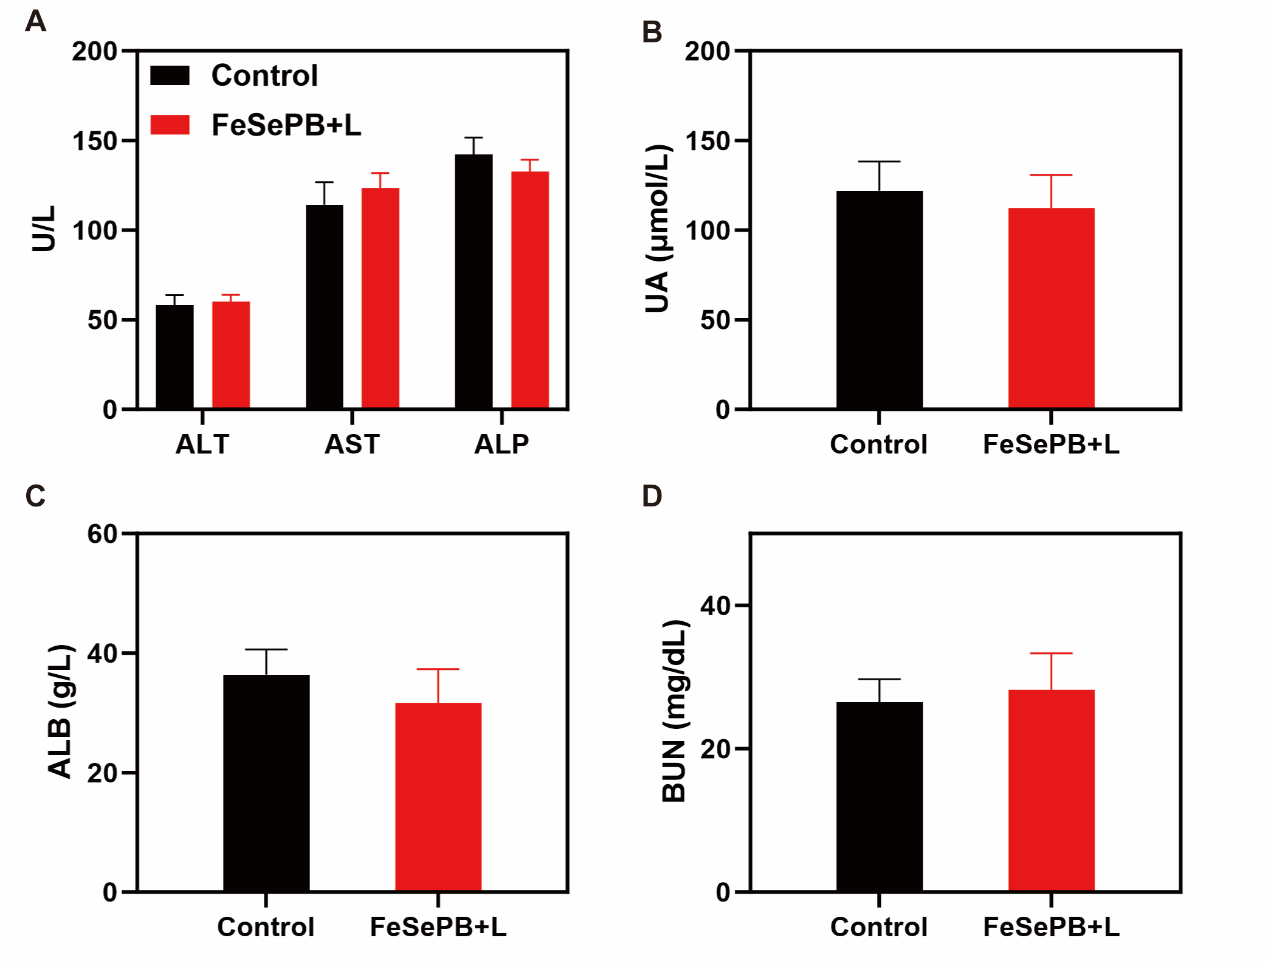


Figure S9. Serum biochemical parameters in BALB/c nude in various treatments. (A) alanine aminotransferase (ALT), aspartate aminotransferase (AST), and alkaline phosphatase (ALP). (B) uric acid (UA). (C) Albumin (ALB). (D) blood urea nitrogen (BUN). Data are presented as mean ± SD (n=5). Statistical significance was determined by one-way ANOVA followed by Tukey’s post hoc test.
